# Supplementary material for: Noncrop flowering plants restore top-down herbivore control in agricultural fields
Source: PubMed Central journal article supplement (PMC3930038; doi:10.1002/ece3.658), 2013-07-02

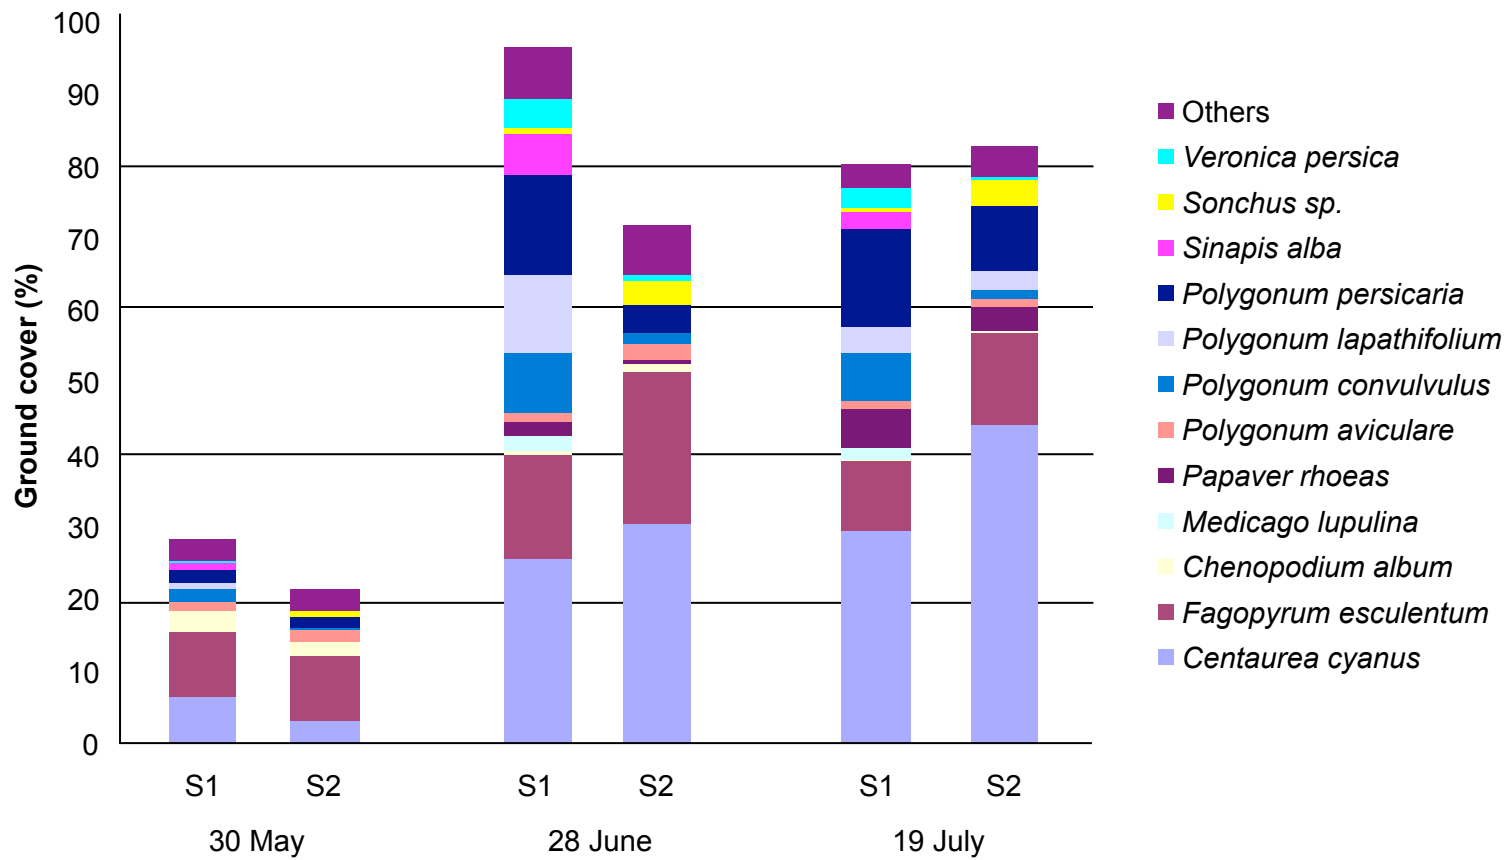

Supplement: ece30003-2634-SD2.pdf [file ece30003-2634-SD2.pdf]
